# Supplementary material for: Introduction of an α,β-unsaturated carbonyl conjugated pyrene–lactose hybrid as a fluorescent molecular probe for micro-scale anisotropic media
Source: Royal Society of Chemistry journal article supplement (doi:10.1039/c5ra26146e), 2016-01-01
Supplement: c5ra26146e1.pdf [file c5ra26146e1.pdf]

## Supporting Information

### Introduction of a $\alpha,\beta$ -unsaturated carbonyl conjugated pyrene-lactose hybrid as a fluorescent molecular probe for micro-scale anisotropic media

Ivy Sarkar<sup>a</sup>, Arasappan Hemamalini<sup>b</sup>, Thangamuthu Mohan Das<sup>\*b,c</sup>, Ashok Kumar Mishra<sup>\*a</sup>

<sup>a</sup> Department of Chemistry, Indian Institute of Technology Madras, Chennai – 600 036, India

<sup>b</sup> Department of Organic Chemistry, University of Madras, Guindy Campus, Chennai - 600 025,  
India

<sup>c</sup> Department of Chemistry, School of Basic and Applied Sciences, Central University of Tamil  
Nadu, Thiruvavur – 610 101, India

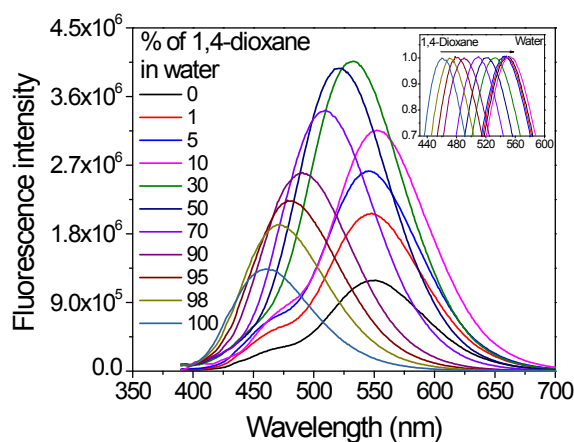

Figure S1: Fluorescence spectra of pyd-lact in water with increasing % of 1,4-dioxane and inset shows normalized fluorescence spectra, at  $\lambda_{ex}$  380 nm.

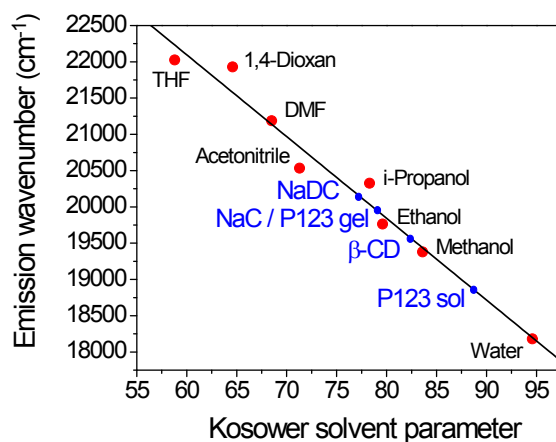

Figure S2: Determination of the medium polarity from  $\lambda_{em}$  value using Kosower Z scale for  $\beta$ -CD, bile salts (NaC, NaDC) and pluronics media.

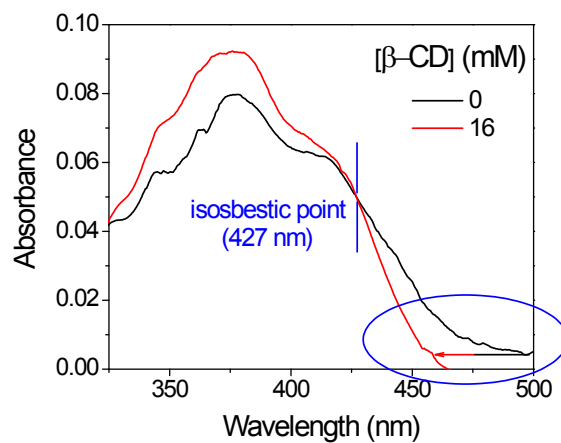

Figure S3: Absorbance spectra of pyd-lact in water and 16 mM  $\beta$ -CD concentration.

Table S1: Fluorescence lifetime data of pyd-lact with increasing  $\beta$ -CD concentration,  $\lambda_{\text{ex}} = 370$  nm.

| $[\beta\text{-CD}]$ (mM) | $\tau_1$ ( $\beta_1$ ) | $\tau_2$ ( $\beta_2$ ) | $\tau_{\text{avg}}$<br>(ns) | $\chi^2$ |
|--------------------------|------------------------|------------------------|-----------------------------|----------|
| 0                        | 0.52 (0.99)            | 3.65 (0.01)            | 0.55                        | 1.21     |
| 1                        | 0.54 (0.89)            | 1.92 (0.11)            | 0.69                        | 1.37     |
| 2                        | 0.56 (0.81)            | 1.82 (0.19)            | 0.80                        | 1.34     |
| 3                        | 0.61 (0.77)            | 1.82 (0.23)            | 0.89                        | 1.32     |
| 4                        | 0.62 (0.75)            | 1.80 (0.25)            | 0.91                        | 1.28     |
| 5                        | 0.72 (0.75)            | 1.87 (0.25)            | 1.01                        | 1.29     |
| 6                        | 0.71 (0.74)            | 1.86 (0.26)            | 1.01                        | 1.27     |
| 7                        | 0.74 (0.74)            | 1.85 (0.26)            | 1.03                        | 1.13     |
| 8                        | 0.90 (0.78)            | 1.97 (0.22)            | 1.13                        | 1.37     |
| 9                        | 0.75 (0.74)            | 1.82 (0.26)            | 1.03                        | 1.21     |
| 10                       | 0.76 (0.74)            | 1.82 (0.26)            | 1.04                        | 1.18     |
| 12                       | 0.78 (0.74)            | 1.81 (0.26)            | 1.05                        | 1.26     |
| 14                       | 0.93 (0.83)            | 2.03 (0.17)            | 1.12                        | 1.37     |
| 16                       | 0.96 (0.84)            | 2.06 (0.16)            | 1.14                        | 1.21     |

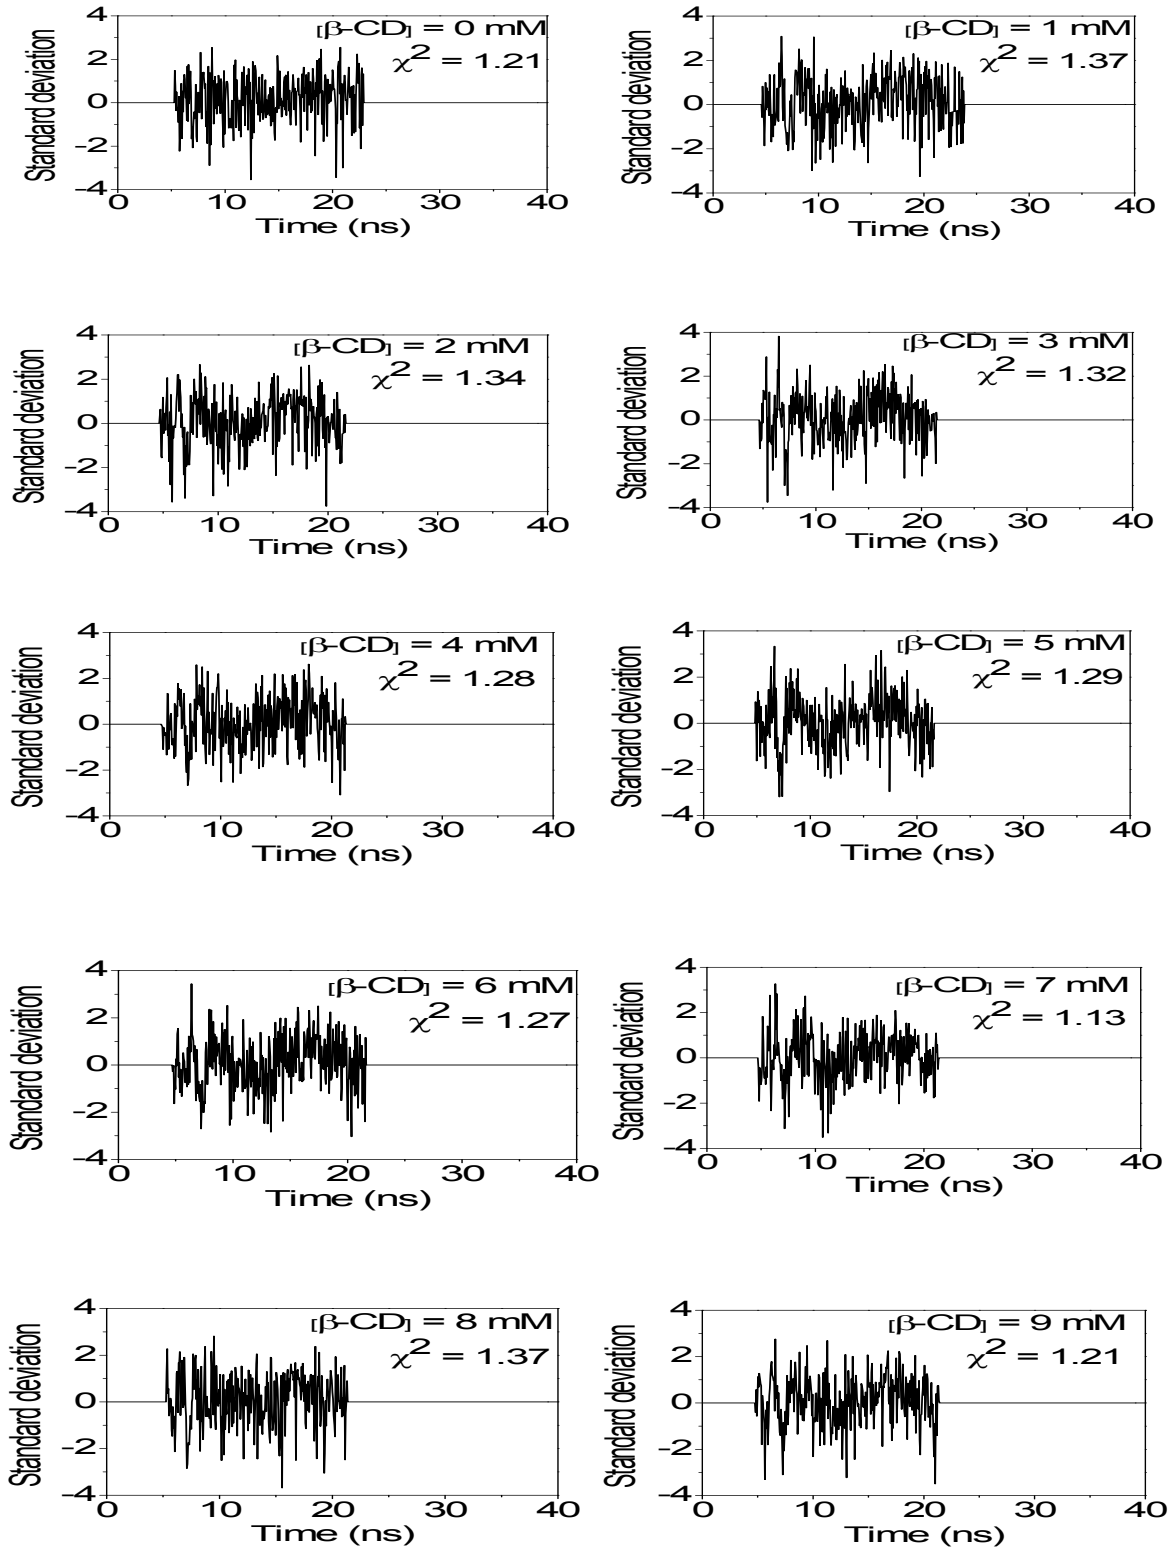

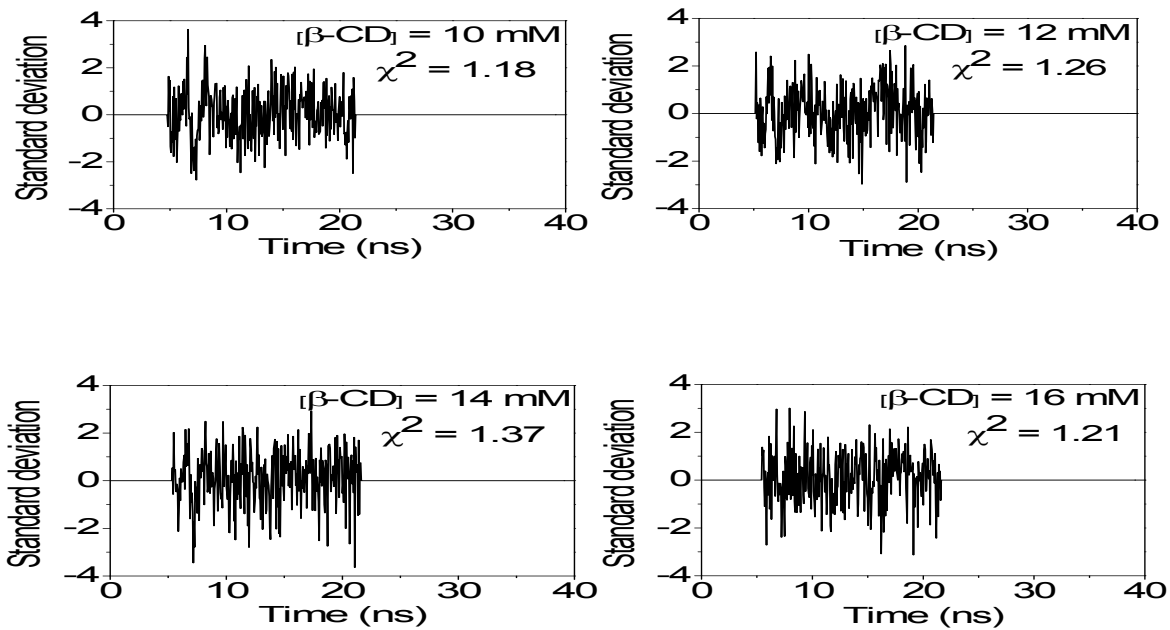

Figure S4: Residue distribution plots of pyd-lact in  $\beta$ -CD (corresponds to Table S1).

Table S2: Fluorescence lifetime data of pyd-lact with increasing NaC concentration, at  $\lambda_{\text{ex}} = 370 \text{ nm}$ .

| [NaC] (mM) | $\tau_1$ ( $\beta_1$ ) | $\tau_2$ ( $\beta_2$ ) | $\tau_{\text{avg}}$ (ns) | $\chi^2$ |
|------------|------------------------|------------------------|--------------------------|----------|
| 0          | 0.52 (0.99)            | 3.65 (0.01)            | 0.55                     | 1.21     |
| 4          | 0.63 (0.88)            | 2.09 (0.12)            | 0.81                     | 1.19     |
| 8          | 1.03 (0.78)            | 2.51 (0.22)            | 1.36                     | 1.22     |
| 12         | 1.02 (0.81)            | 2.51 (0.19)            | 1.30                     | 1.25     |
| 14         | 0.88 (0.79)            | 2.32 (0.21)            | 1.18                     | 1.22     |
| 16         | 0.79 (0.75)            | 2.17 (0.25)            | 1.13                     | 1.22     |
| 20         | 0.89 (0.81)            | 2.36 (0.19)            | 1.17                     | 1.22     |
| 24         | 0.80 (0.79)            | 2.20 (0.21)            | 1.09                     | 1.22     |
| 28         | 0.88 (0.78)            | 2.23 (0.22)            | 1.18                     | 1.26     |
| 32         | 0.82 (0.78)            | 2.19 (0.22)            | 1.12                     | 1.25     |
| 36         | 0.86 (0.80)            | 2.26 (0.20)            | 1.14                     | 1.24     |
| 40         | 0.77 (0.78)            | 2.14 (0.22)            | 1.07                     | 1.19     |
| 44         | 0.81 (0.80)            | 2.25 (0.20)            | 1.10                     | 1.21     |
| 48         | 0.77 (0.79)            | 2.18 (0.21)            | 1.07                     | 1.20     |

Table S3: Fluorescence lifetime data of pyd-lact with increasing NaDC concentration, at  $\lambda_{\text{ex}} = 370$  nm.

| [NaDC] (mM) | $\tau_1$ ( $\beta_1$ ) | $\tau_2$ ( $\beta_2$ ) | $\tau_{\text{avg}}$<br>(ns) | $\chi^2$ |
|-------------|------------------------|------------------------|-----------------------------|----------|
| 0           | 0.52 (0.99)            | 3.65 (0.01)            | 0.55                        | 1.21     |
| 1           | 0.61 (0.92)            | 2.76 (0.08)            | 0.78                        | 1.25     |
| 2           | 0.66 (0.89)            | 2.55 (0.11)            | 0.87                        | 1.36     |
| 3           | 0.92 (0.84)            | 2.53 (0.16)            | 1.18                        | 1.21     |
| 4           | 0.86 (0.83)            | 2.32 (0.17)            | 1.11                        | 1.31     |
| 5           | 0.82 (0.81)            | 2.13 (0.19)            | 1.07                        | 1.22     |
| 6           | 0.84 (0.81)            | 2.08 (0.19)            | 1.08                        | 1.20     |
| 7           | 0.87 (0.83)            | 2.19 (0.17)            | 1.09                        | 1.27     |
| 8           | 0.86 (0.82)            | 2.16 (0.18)            | 1.09                        | 1.21     |
| 10          | 0.85 (0.82)            | 2.13 (0.18)            | 1.08                        | 1.11     |
| 12          | 0.88 (0.83)            | 2.20 (0.17)            | 1.10                        | 1.29     |
| 14          | 0.88 (0.84)            | 2.24 (0.16)            | 1.10                        | 1.18     |
| 16          | 0.84 (0.79)            | 2.07 (0.21)            | 1.10                        | 1.19     |
| 18          | 0.85 (0.81)            | 2.11 (0.19)            | 1.09                        | 1.09     |

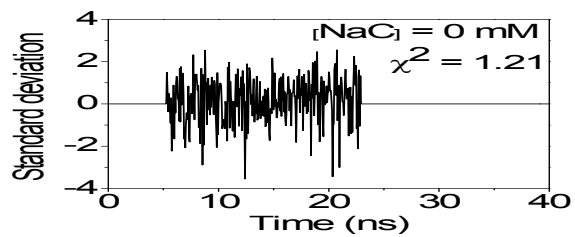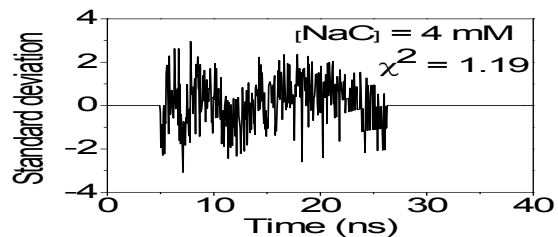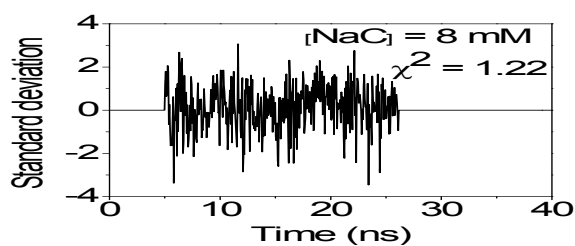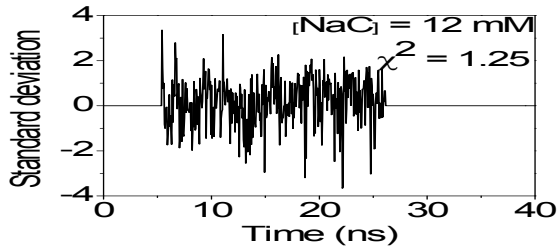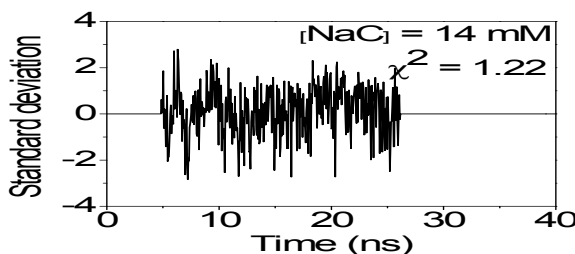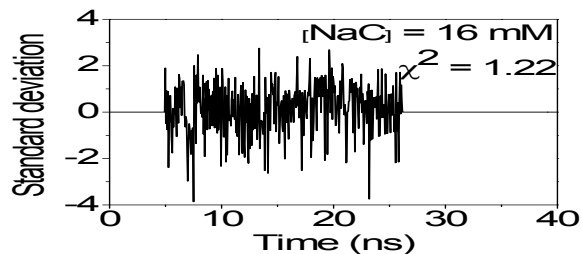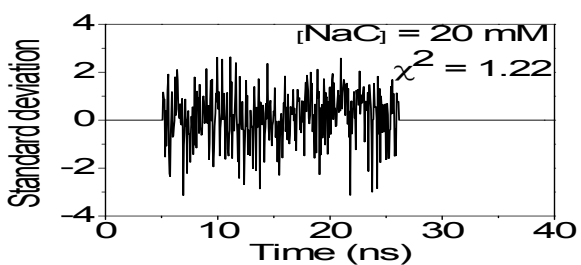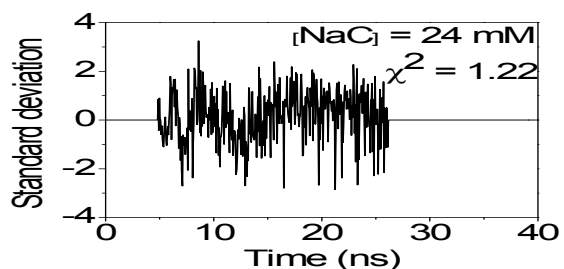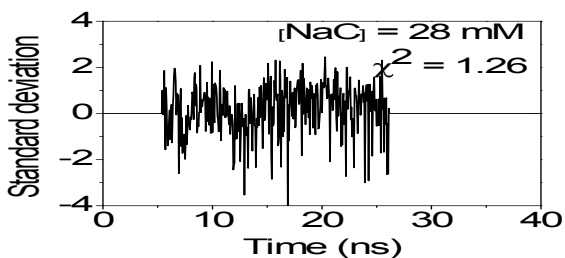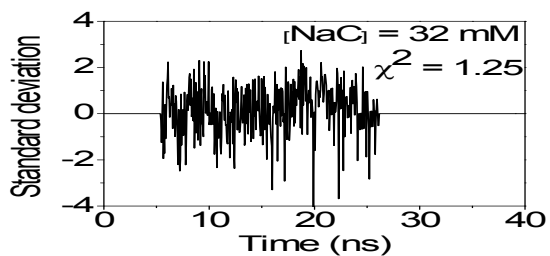

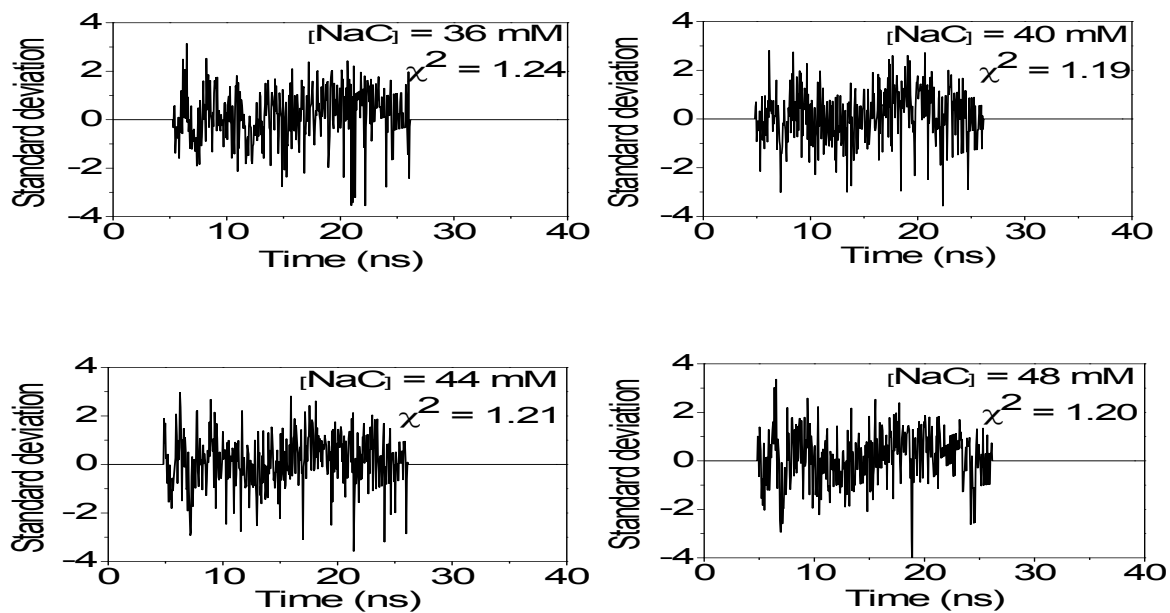

Figure S5: Residue distribution plots of pyd-lact in NaC (corresponds to Table S2).

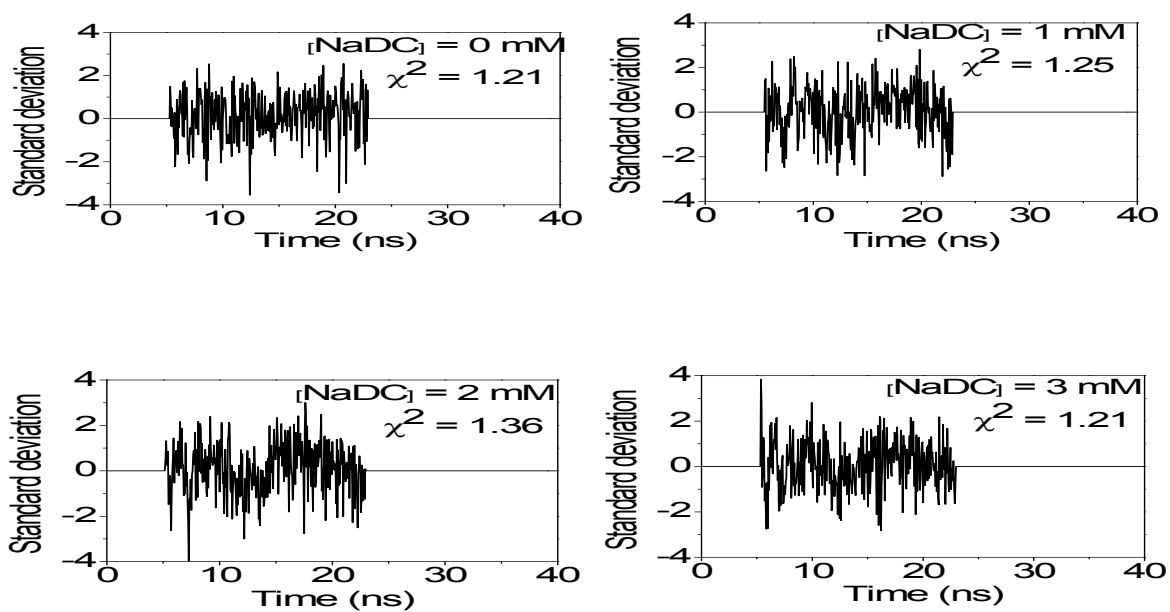



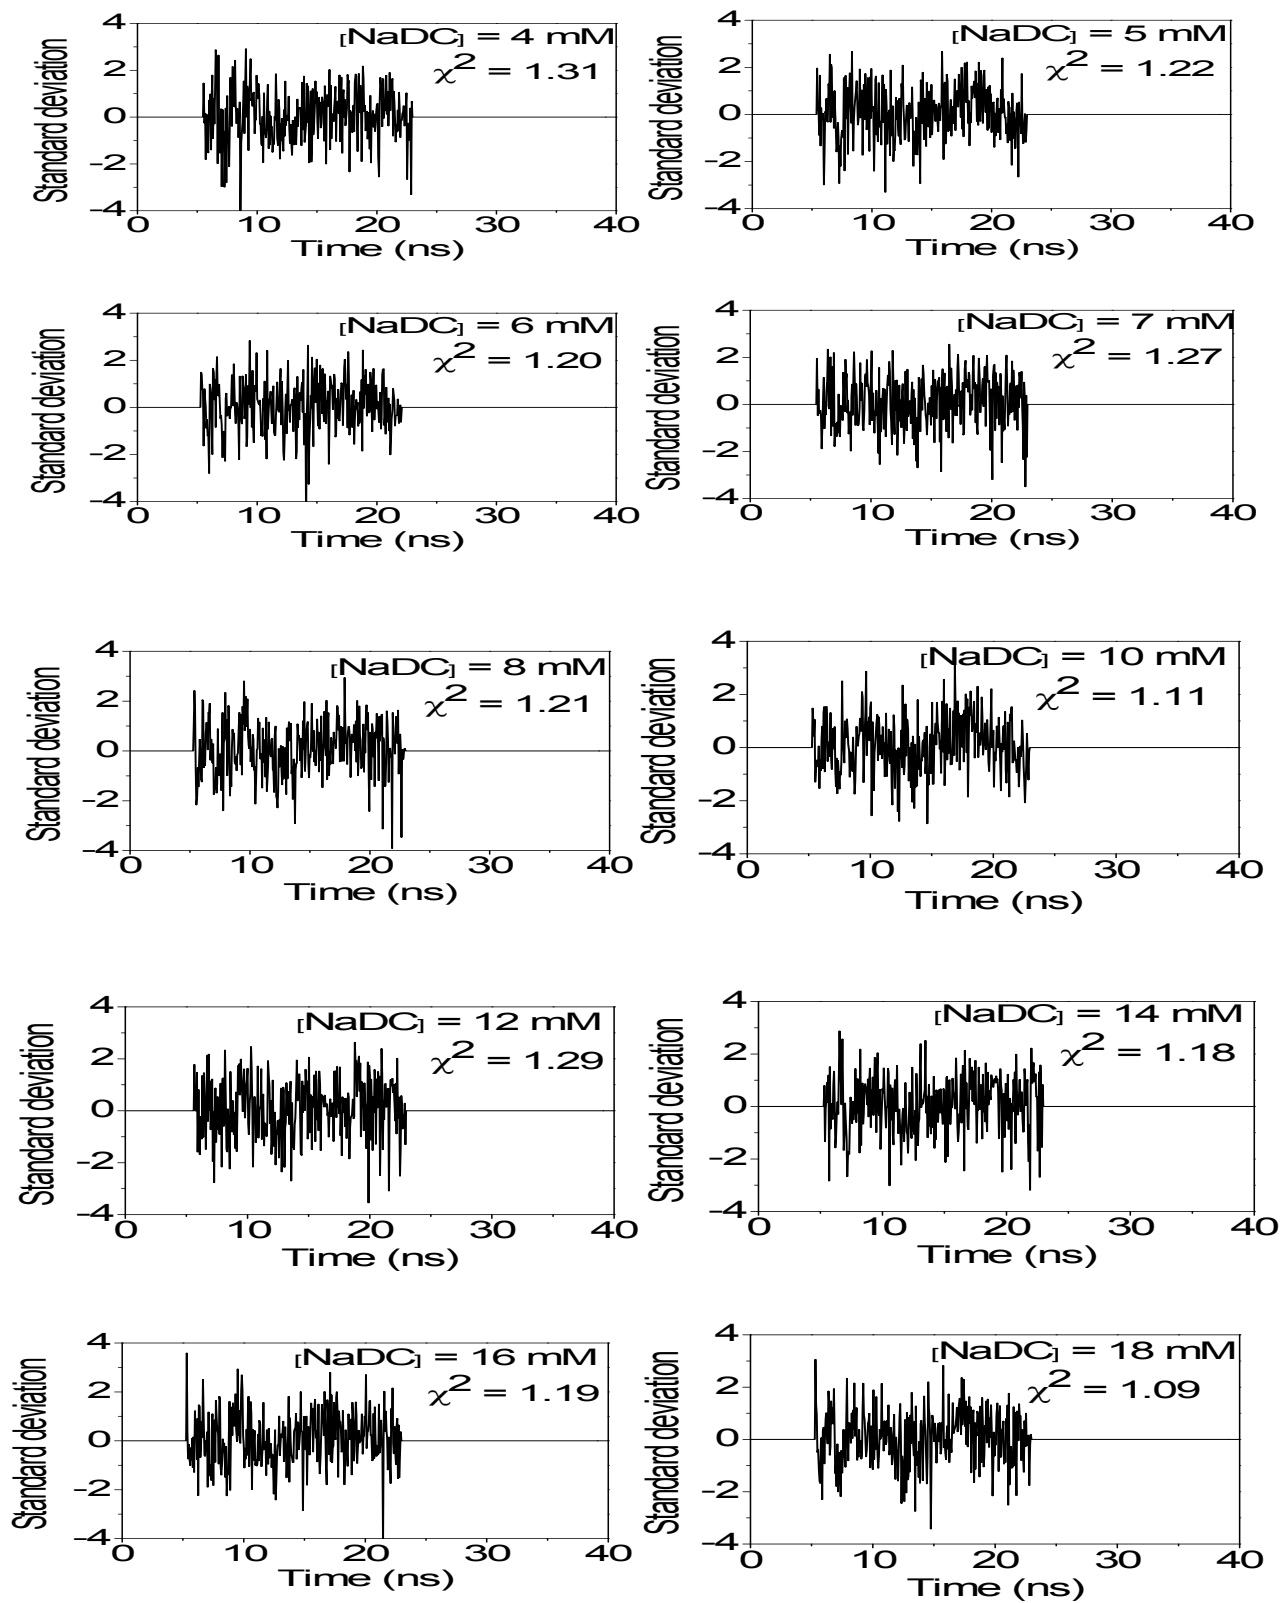

Figure S6: Residue distribution plots of pyd-lact in NaDC (corresponds to Table S3).

Table S4: Fluorescence lifetime data of pyd-lact in water and 10% pluronic P123 with increasing temperature, at  $\lambda_{\text{ex}} = 370$  nm.

| Sample   | Temperature (°C) | $\tau_1$ ( $\beta_1$ ) | $\tau_2$ ( $\beta_2$ ) | $\tau_{\text{avg}}$ (ns) | $\chi^2$ |
|----------|------------------|------------------------|------------------------|--------------------------|----------|
| Water    | 5                | 0.80 (0.99)            | 4.27 (0.01)            | 0.83                     | 1.14     |
|          | 11               | 0.71 (0.98)            | 4.03 (0.02)            | 0.78                     | 1.27     |
|          | 15               | 0.66 (0.98)            | 3.76 (0.02)            | 0.72                     | 1.21     |
|          | 20               | 0.57 (0.98)            | 3.73 (0.02)            | 0.63                     | 1.25     |
|          | 24               | 0.60 (0.98)            | 4.09 (0.02)            | 0.67                     | 1.32     |
| P123 10% | 5                | 1.37 (0.26)            | 2.60 (0.74)            | 2.28                     | 1.22     |
|          | 11               | 1.07 (0.31)            | 2.39 (0.69)            | 1.98                     | 1.20     |
|          | 15               | 1.08 (0.38)            | 2.19 (0.62)            | 1.77                     | 1.27     |
|          | 20               | 0.97 (0.67)            | 2.08 (0.33)            | 1.34                     | 1.27     |
|          | 24               | 1.02 (0.77)            | 2.11 (0.23)            | 1.27                     | 1.32     |

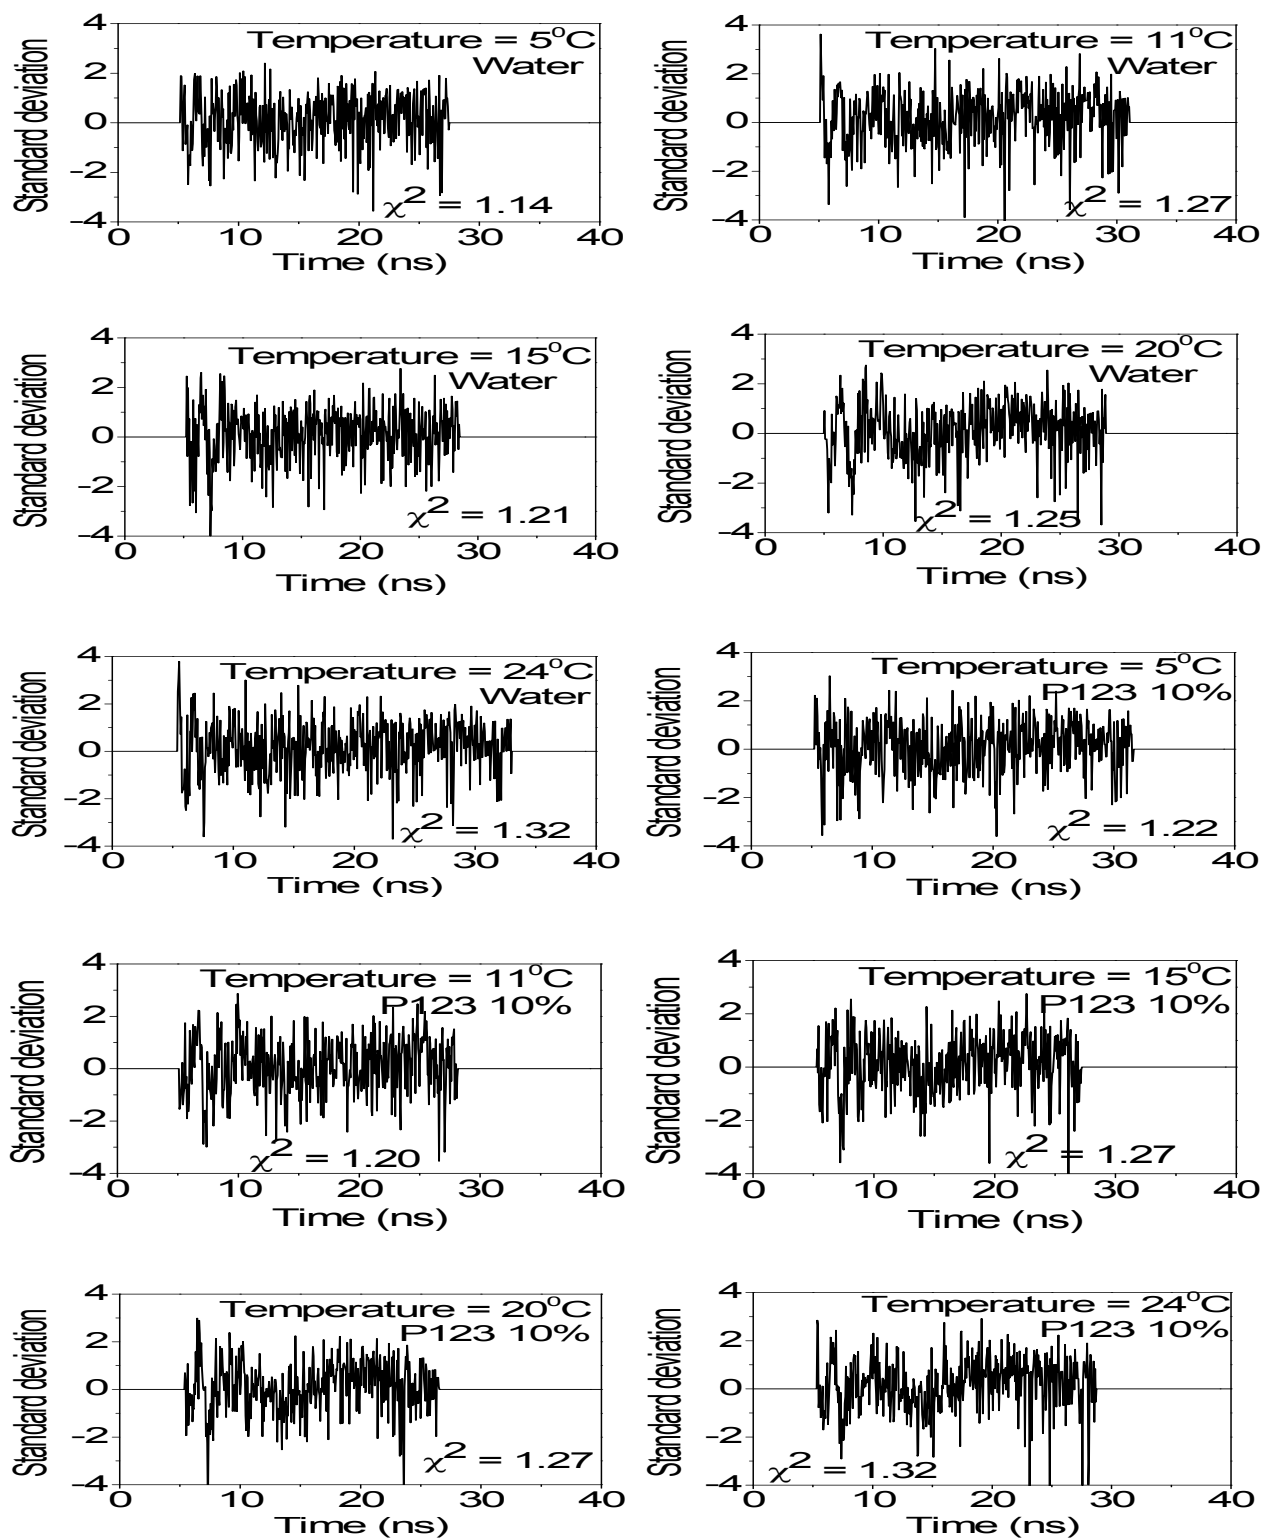

Figure S7: Residue distribution plots of pyd-lact in water and 10% P123 with temperature (corresponds to Table S4).

UNIV. OF MADRAS

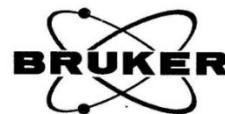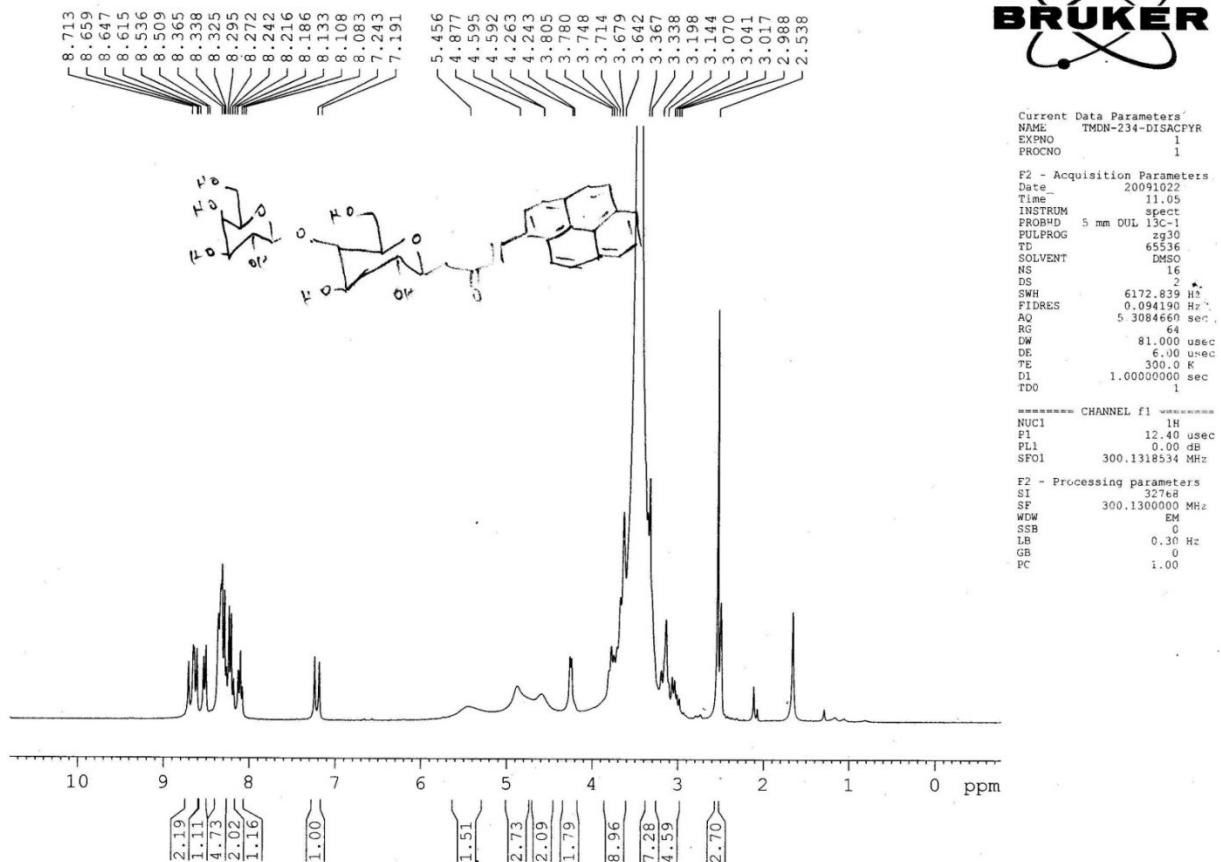

Figure S8: <sup>1</sup>H NMR spectrum of pyd-lact.

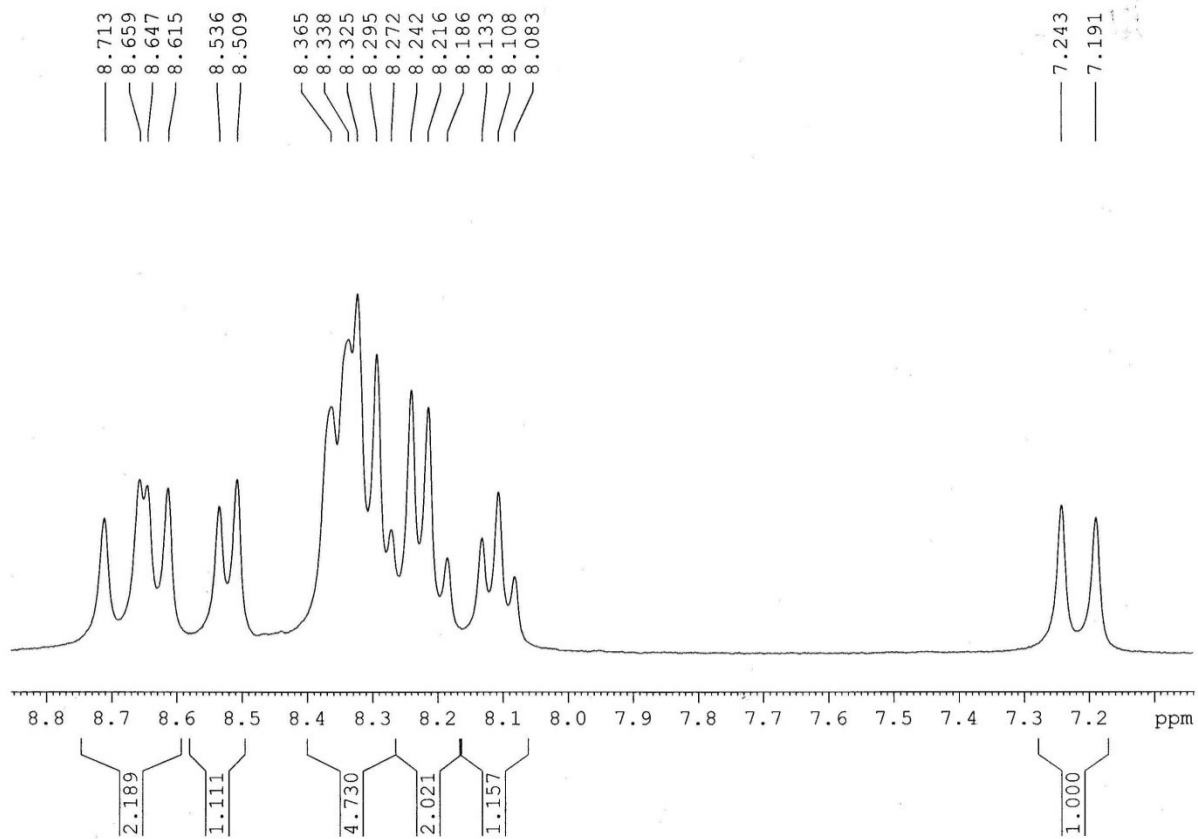

Figure S9:  $^1\text{H}$  NMR expansion spectrum of pyd-lact.

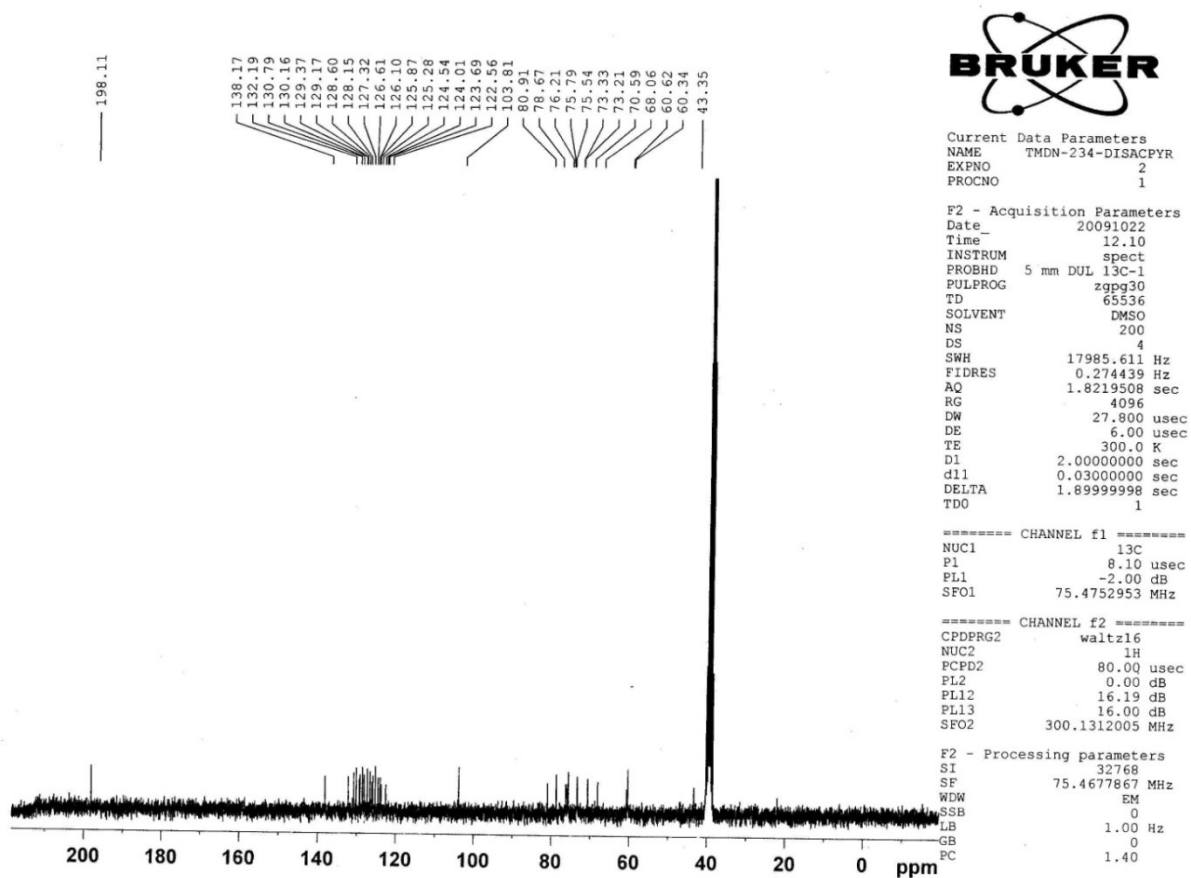

Figure S10: <sup>13</sup>C NMR spectrum of pyd-lact.
